# Supplementary material
Source: PubMed Central journal article supplement (PMC6375742)
Supplement: NIHMS1513192-supplement-1.pdf [file NIHMS1513192-supplement-1.pdf]

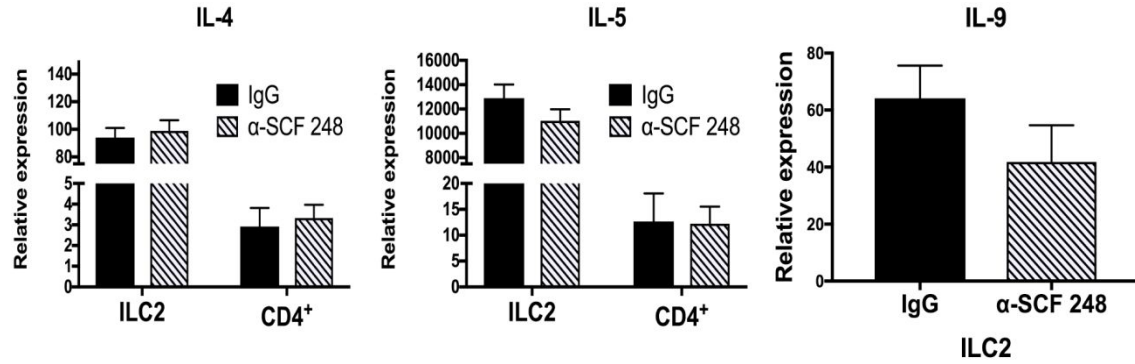

Supplemental Figure 1- Assessment of IL-4, IL-5, and IL-9 mRNA expression from sorted ILC2 and CD4<sup>+</sup> cells from allergic mice. IL-9 mRNA expression was detected only in ILC2 and none in CD4<sup>+</sup> T cells. No significant differences were observed in either group. Data represent mean  $\pm$  SE, from 4-5 mice/group.
